# Supplementary material for: Clinical and genetic associations of asymmetric apical and septal left ventricular hypertrophy
Source: bioRxiv or medRxiv preprint supplement (doi:10.1101/2023.10.03.23296510), 2023-10-05

**Supplementary Figure 2.** Distributions of a) apical mass and b) septal mass versus sex.

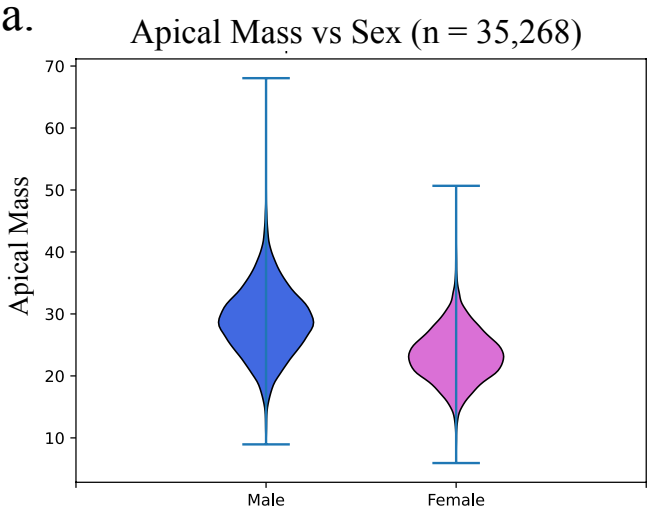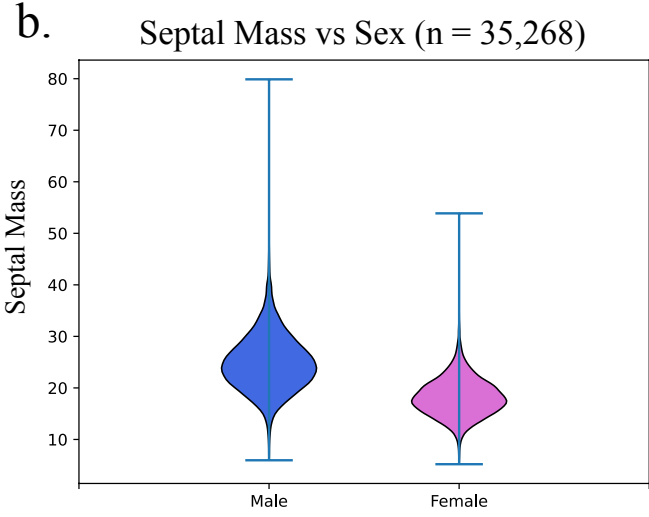

Supplement: Supplementary file [file media-1.pdf]
