# Supplementary material for: Clinical and genetic associations of asymmetric apical and septal left ventricular hypertrophy
Source: bioRxiv or medRxiv preprint supplement (doi:10.1101/2023.10.03.23296510), 2023-10-05
Supplement: Supplementary file [file media-4.pdf]

**Supplementary Table 1.** Results of eQTL analysis using FUMA for lead variants in the GWAS of apical and septal mass

| <b>Phenotype</b> | <b>Chr</b> | <b>Candidate Gene</b> | <b>hg37 Position</b> | <b>Ref</b> | <b>Alt</b> | <b>Tissue</b>    | <b>p-value</b> |
|------------------|------------|-----------------------|----------------------|------------|------------|------------------|----------------|
| Apex             | 1          | <b>CASQ2</b>          | 116,297,758          | A          | C          | Coronary Artery  | 8.51e-10       |
| Apex             | 1          | <b>CASQ2</b>          | 116,297,758          | A          | C          | Atrial Appendage | 3.95e-8        |
| Apex             | 1          | <b>CASQ2</b>          | 116,297,758          | A          | C          | Left Ventricle   | 1.21e-9        |
| Apex             | 6          | <b>PLN</b>            | 118,876539           | T          | C          | Aorta            | 2.84e-8        |
| Apex             | 6          | <b>PLN</b>            | 118,876539           | T          | C          | Atrial Appendage | 1.5e-4         |
| Apex             | 17         | MAPT-AS1              | 43,948,347           | C          | T          | Left Ventricle   | 7.80e-5        |
| Septal           | 3          | <b>ESYT3</b>          | 138,172,951          | A          | G          | Coronary Artery  | 1.0e-5         |
